# Supplementary material for: Harnessing nonlinear rubber swelling for bulk synthesis of anisotropic hybrid nanoparticles
Source: Royal Society of Chemistry journal article supplement (doi:10.1039/c4tc01660b), 2014-01-01
Supplement: c4tc01660b1.pdf [file c4tc01660b1.pdf]

## Supporting Information

# Harnessing Nonlinear Rubber Swelling for Bulk Synthesis of Anisotropic Hybrid Nanoparticles

Tao Ding,<sup>\*ab</sup> Stoyan K. Smoukov,<sup>\*a</sup> Jeremy J. Baumberg<sup>b</sup>

<sup>†</sup>Department of Materials Science and Metallurgy, University of Cambridge, 27 Charles Babbage Road, Cambridge CB3 0FS, UK. <sup>‡</sup>Nanophotonics Centre, Cavendish Laboratory, University of Cambridge, CB3 0HE, UK

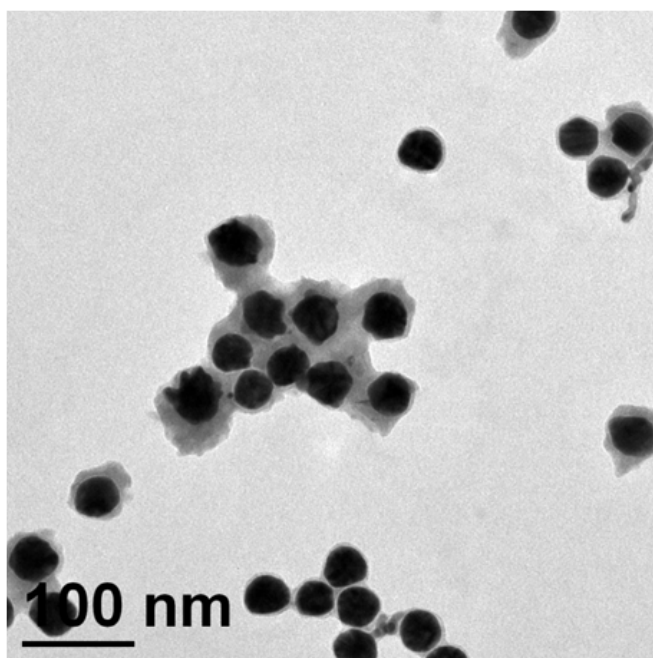

Figure S1. With Au NPs as the seeds, but with no PVP in presence, the PDVB were aggregated along with Au NPs.

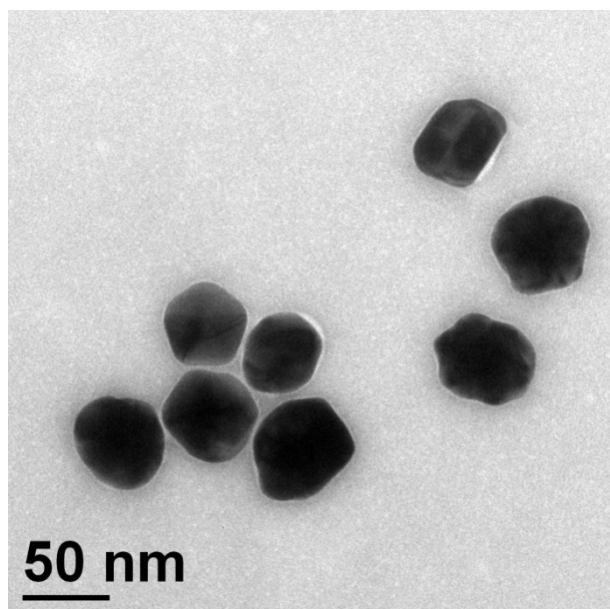

Figure S2. The TEM image of Au-PS hybrid nanoparticles obtained with styrene as the monomer.
